# Supplementary material for: A bifunctional nanoplatform based on copper manganate nanoflakes for bacterial elimination via a catalytic and photothermal synergistic effect
Source: Royal Society of Chemistry journal article supplement (doi:10.1039/d0bm00706d), 2020-01-01
Supplement: d0bm00706d1.pdf [file d0bm00706d1.pdf]

**A Bifunctional Nanoplatform Based on Copper Manganate  
Nanoflakes for the Bacterial Elimination via Catalysis and  
Photothermal Synergistic Effect**

Zhirong Guo, Yingnan Liu, Yalan Zhang, Xinyu Sun, Fan Li, Tong Bu, Qinzhi Wang,

Li Wang\*

College of Food Science and Engineering, Northwest A&F University, Yangling

712100, Shaanxi, China

**Corresponding Author** \*Tel.: 029-87092486; Fax: 029-87092486.

E-mail address: [lwang@nwsuaf.edu.cn](mailto:lwang@nwsuaf.edu.cn)

## Results

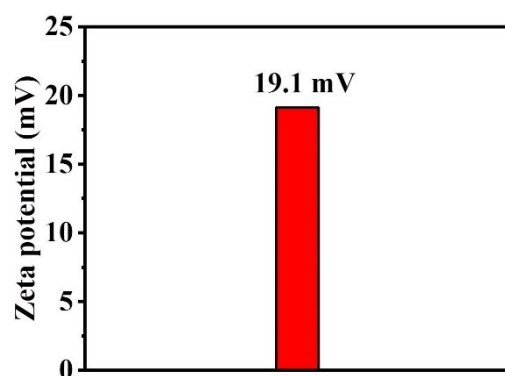

**Fig S1.** Zeta ( $\zeta$ ) potential value of CuMnO<sub>2</sub> NFs.

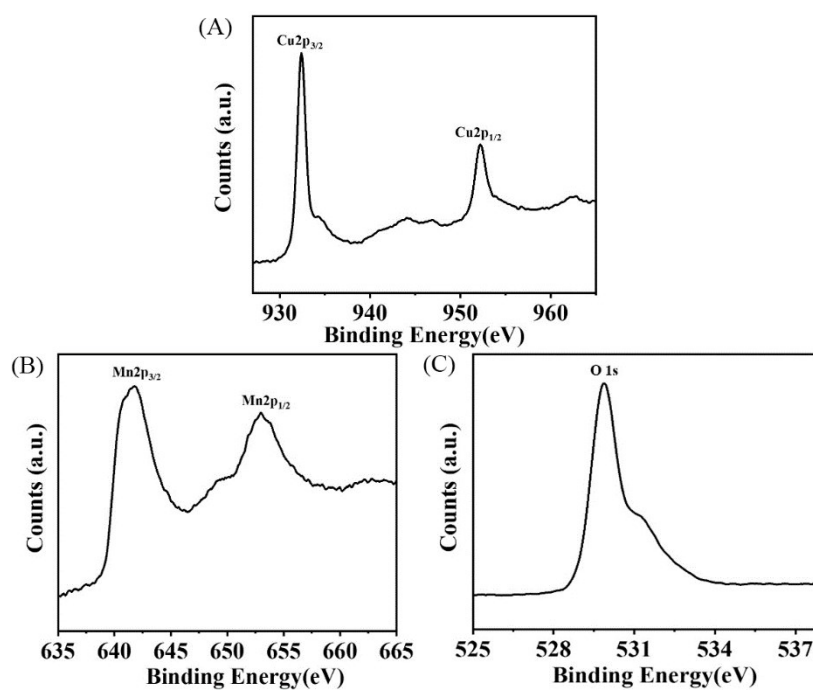

**Fig S2.** High-resolution XPS spectra of CuMnO<sub>2</sub> NFs samples (A) Cu 2p, (B) Mn 2p, (C) O 1s.

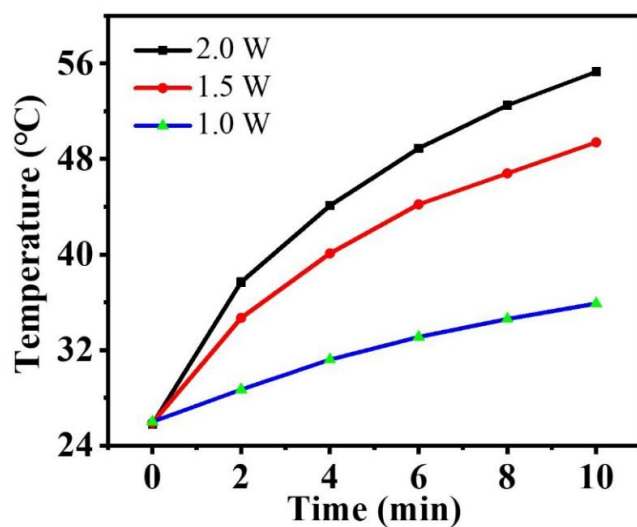

**Fig S3.** The rising temperature curves of CuMnO<sub>2</sub> NFs dispersion (200 µg mL<sup>-1</sup>) at different powers of an 808 nm laser.

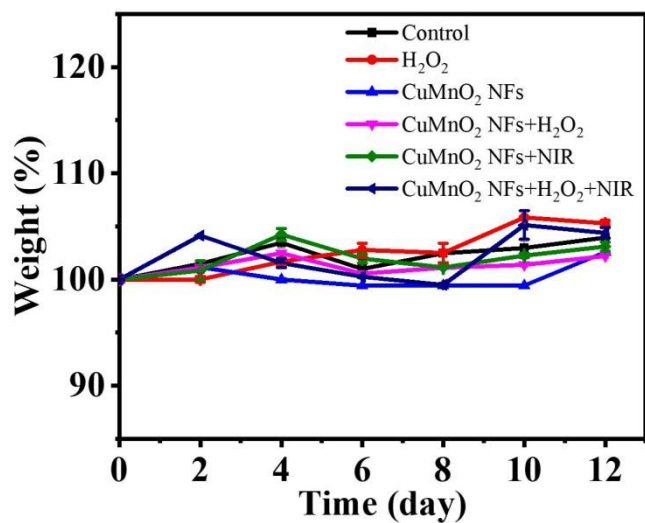

**Fig S4.** The change curves of body weight of mice in different groups with time relative to the first day of treatment.
